# Supplementary material for: A Boron-Containing Analogue of Acetaminophen Induces Analgesic Effect in Hot Plate Test and Limited Hepatotoxicity
Source: MDPI journal article supplement (doi:10.3390/inorganics11060261), 2023-06-20
Supplement: s1 [file s1]

## Supplementary material

### A Boron-containing Analogue Of Acetaminophen Induces Analgesic Effect in Hot-Plate Test And Limited Hepatotoxicity

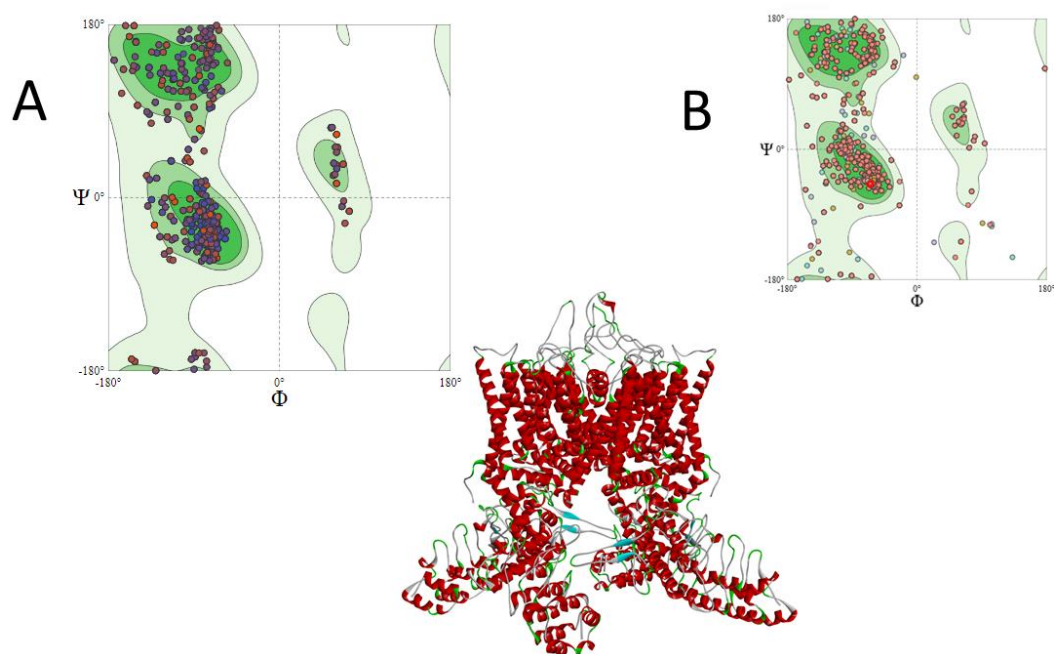

**FIGURE S1.** Ramachandran plots of designed protein from Swiss model. A. For rat TRPV1 (PDB code: 5IRX) B. For human TRPV1 (built by homology) and C. The complete 3D-structure of modeled human TRPV1 protein.

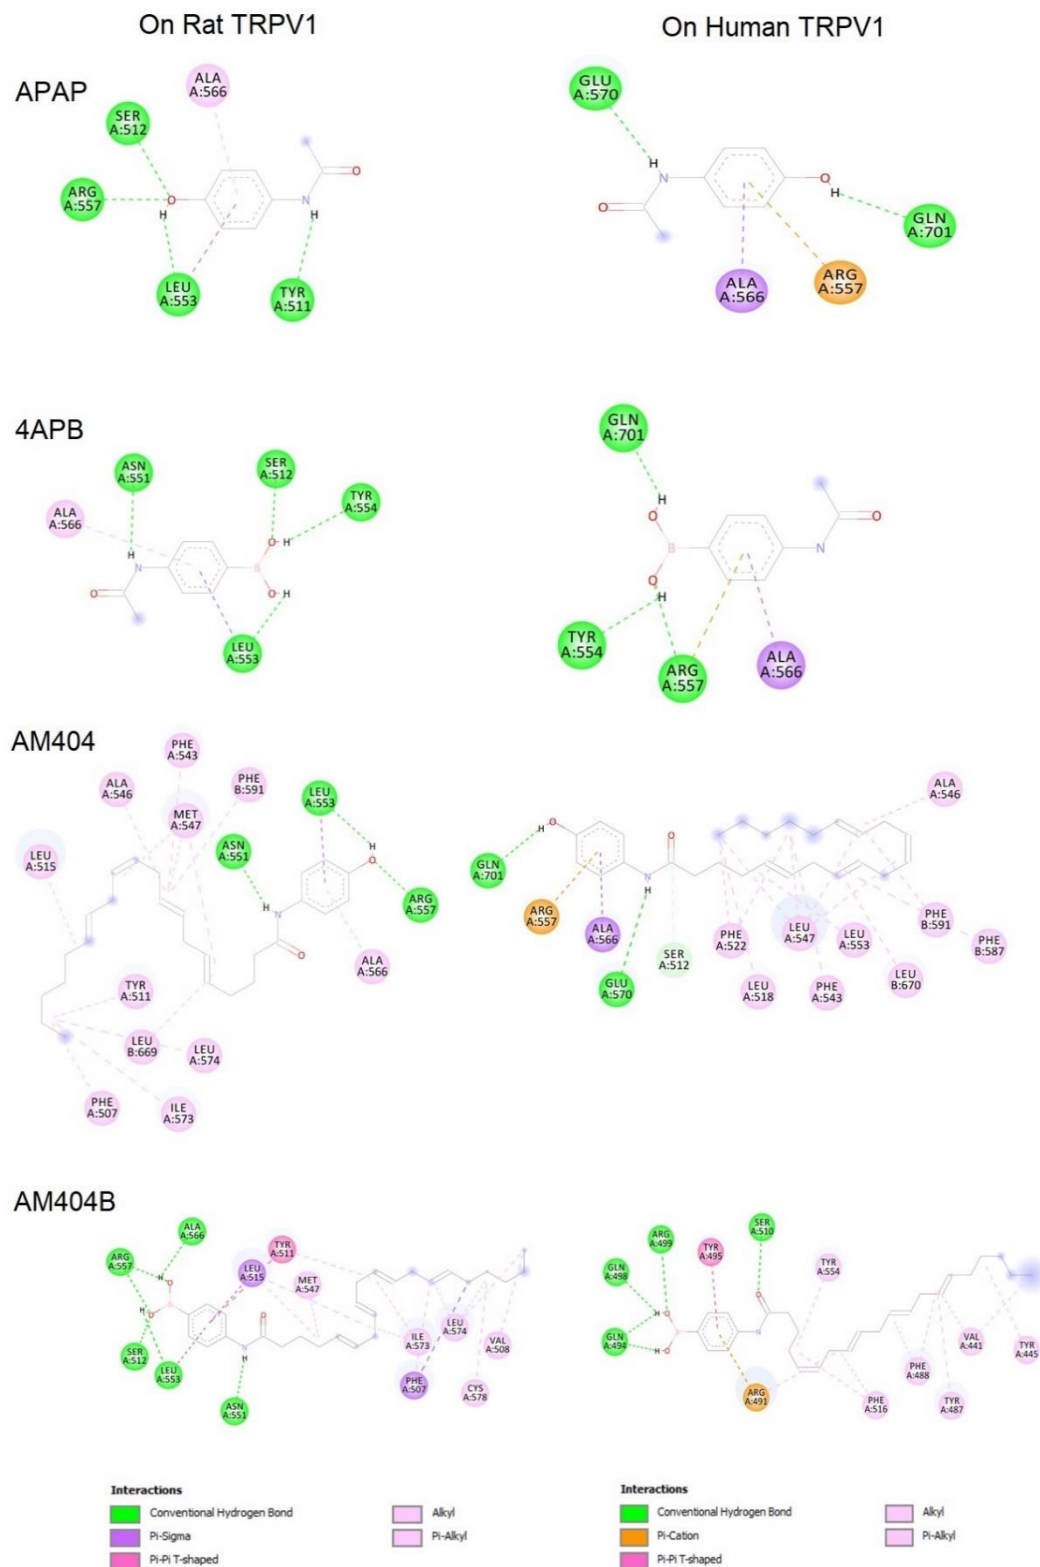

**FIGURE S2.** The 2D-schemes of interactions of APAP, 2APB and its metabolites (AM404 and AM404B, respectively) on the rat-TRPV1(at left) or human-TRPV1 (at right).

**Table S1.** Results from Swiss-model server structural assessment for the TRPV1 used proteins.

| PDB ID                                          | GMQE | QSQE | IDENTITY<br>(From<br>template) | METHOD | RAMACHANDRAN<br>PLOT                  |
|-------------------------------------------------|------|------|--------------------------------|--------|---------------------------------------|
| 5IRX                                            | 0.73 | 0.85 | N.A.                           | EM     | 89.21 Favoured<br>0.12% E64Pro F64Pro |
| Modeled<br>Human<br>TRPV1<br>(Based on<br>3J5P) | 0.69 | 0.86 | 92.31%                         | EM     | 91% Favoured angles<br>(SWISS MODEL)  |

**Table S2.** Evaluated compounds with their labeled codes.

|    | CODE   | NAME                                             |
|----|--------|--------------------------------------------------|
| 1  | 3CysA  | 3-(S-Cysteiny)l acetaminophen                    |
| 2  | 3CysB  | 3-(S-Cysteiny)l-4-acetamidophenylboronic acid    |
| 3  | 3GluA  | 3-(S-Glutathionyl) acetaminophen                 |
| 4  | 3GluB  | 3-(S-Glutathionyl)-4-acetamidophenylboronic acid |
| 5  | 3HA    | 3-Hydroxyacetaminophen                           |
| 6  | 3HAGl  | 3-Hydroxyacetaminophen Glucuronide               |
| 7  | 3HASu  | 3-Hydroxyacetaminophen Sulphate                  |
| 8  | 3HB    | 3-Hydroxy-4-acetamidophenylboronic acid          |
| 9  |        | 3-Hydroxy-4-acetamidophenylboronic acid          |
|    | 3HBGL  | Glucuronide                                      |
| 10 | 3HBSu  | 3-Hydroxy-4-acetamidophenylboronic acid Sulphate |
| 11 | 3MA    | 3-Methoxyacetaminophen                           |
| 12 | 3MB    | 3-Methoxy-4-acetamidophenylboronic acid          |
| 13 | 3MeA   | 3-(S-Mercapto)acetaminophen                      |
| 14 | 3MeB   | 3-(S-Mercapto)-4-acetamidophenylboronic acid     |
| 15 | 3MeTA  | 3-(S-ThioMethyl)acetaminophen                    |
| 16 | 3MeTB  | 3-(S-Thiomethyl)-4-acetamidophenylboronic acid   |
| 17 | 4AB    | 4-aminophenylboronic acid                        |
| 18 | 4AP    | 4-aminophenol                                    |
| 19 | 4-APB  | 4-Acetamidophenylboronic acid                    |
| 20 | AcGl   | acetaminophen Glucuronide                        |
| 21 | AcSu   | Acetaminophen Sulphate                           |
| 22 | AM404  | N-arachidonoylaminophenol                        |
| 23 | AM404B | N-arachidonoyl-4-aminophenylboronic acid         |
| 24 | ANA    | Anandamide                                       |
| 25 | APAP   | Acetaminophen                                    |
| 26 | BGl    | 4-Acetamidophenylboronic acid Glucuronide        |
| 27 | Bsu    | 4-Acetamidophenylboronic acid Sulphate           |
| 28 | Cap    | Capsaicin                                        |
| 29 | Capz   | Capsazepine                                      |
| 30 | NAP    | N-acetyl-p-benzoquinone imine                    |
| 31 | NAPB   | N-acetyl-p-benzoboronic acid imine               |
| 32 | PbenB  | 1-benzoquinone-4-boric acid                      |
| 33 | Pbenz  | 1, 4-benzoquinone                                |

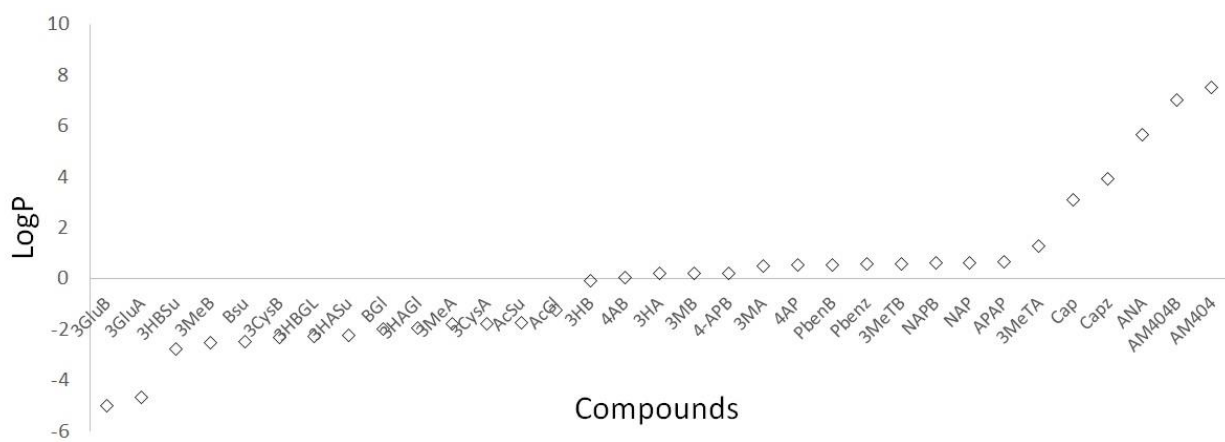

**FIGURE S3.** Compounds ordered considering the LogP (octanol-water partition coefficient) calculated for each tested compound from molinspiration.com. Abbreviations are as in Table S2.

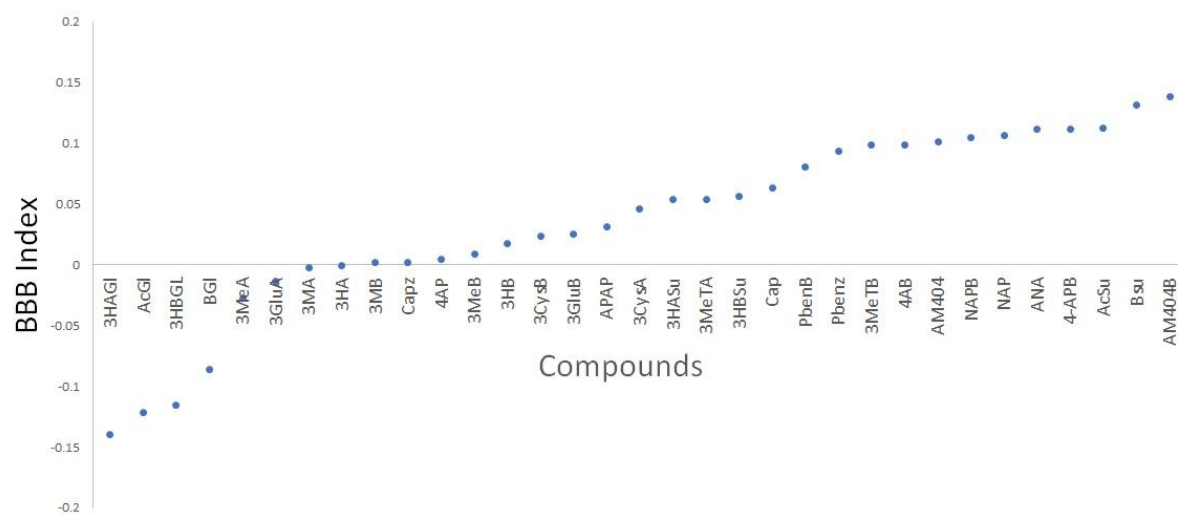

**FIGURE S4.** Blood brain barrier index calculated for each compound from prediction server (cbligand.org).

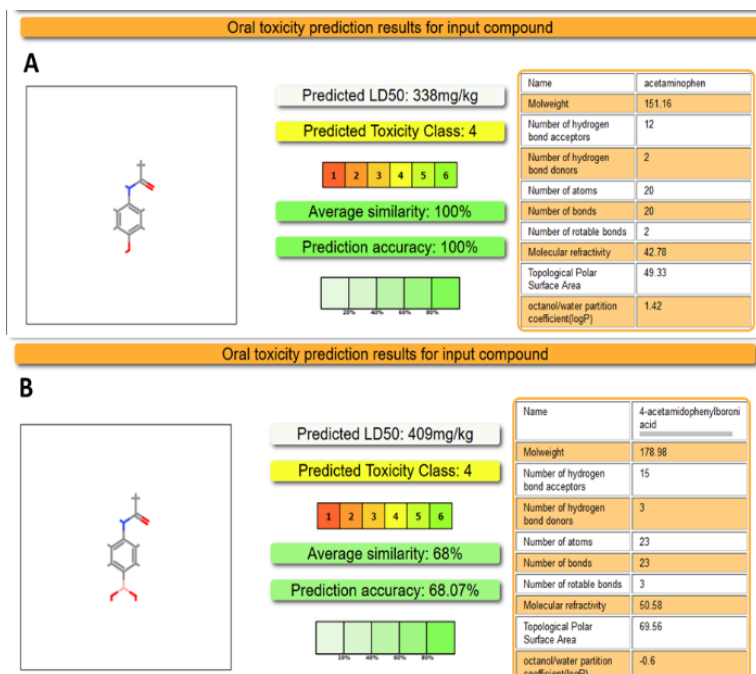

Figure S5. PROTOX II prediction of LD<sub>50</sub> values for APAP(A) and 4-APB(B).

**A**

| Toxicity Model Report                     |                                                                                     |               |            |             |
|-------------------------------------------|-------------------------------------------------------------------------------------|---------------|------------|-------------|
| Classification                            | Target                                                                              | Shorthand     | Prediction | Probability |
| Organ toxicity                            | Hepatotoxicity                                                                      | dtl           | Active     | 0.74        |
| Toxicity end points                       | Carcinogenicity                                                                     | carcino       | Inactive   | 0.51        |
| Toxicity end points                       | Immunotoxicity                                                                      | immuno        | Inactive   | 0.99        |
| Toxicity end points                       | Mutagenicity                                                                        | mutagen       | Inactive   | 0.90        |
| Toxicity end points                       | Cytotoxicity                                                                        | cyto          | Inactive   | 0.62        |
| Tox21-Nuclear receptor signaling pathways | Aryl hydrocarbon Receptor (AHR)                                                     | nr_ahr        | Inactive   | 0.90        |
| Tox21-Nuclear receptor signaling pathways | Androgen Receptor (AR)                                                              | nr_ar         | Inactive   | 1.0         |
| Tox21-Nuclear receptor signaling pathways | Androgen Receptor Ligand Binding Domain (AR-LBD)                                    | nr_ar_lbd     | Inactive   | 1.0         |
| Tox21-Nuclear receptor signaling pathways | Aromatase                                                                           | nr_aromatase  | Inactive   | 1.0         |
| Tox21-Nuclear receptor signaling pathways | Estrogen Receptor Alpha (ER)                                                        | nr_er         | Inactive   | 0.94        |
| Tox21-Nuclear receptor signaling pathways | Estrogen Receptor Ligand Binding Domain (ER-LBD)                                    | nr_er_lbd     | Inactive   | 0.99        |
| Tox21-Nuclear receptor signaling pathways | Peroxisome Proliferator Activated Receptor Gamma (PPAR-Gamma)                       | nr_ppar_gamma | Inactive   | 1.0         |
| Tox21-Stress response pathways            | Nuclear factor (erythroid-derived 2)-like 2/antioxidant response element (nrf2/ARE) | nr_nfe2l3     | Inactive   | 0.98        |
| Tox21-Stress response pathways            | Heat shock factor response element (HSE)                                            | nr_hse        | Inactive   | 0.98        |
| Tox21-Stress response pathways            | Mitochondrial Membrane Potential (MMP)                                              | nr_mmp        | Inactive   | 0.96        |
| Tox21-Stress response pathways            | Phosphoprotein (Tumor Suppressor) p53                                               | nr_p53        | Inactive   | 0.95        |
| Tox21-Stress response pathways            | ATPase family AAA domain-containing protein 5 (ATAD5)                               | nr_atad5      | Inactive   | 0.97        |

**B**

| Toxicity Model Report                     |                                                                                     |               |            |             |
|-------------------------------------------|-------------------------------------------------------------------------------------|---------------|------------|-------------|
| Classification                            | Target                                                                              | Shorthand     | Prediction | Probability |
| Organ toxicity                            | Hepatotoxicity                                                                      | dtl           | Inactive   | 0.52        |
| Toxicity end points                       | Carcinogenicity                                                                     | carcino       | Inactive   | 0.72        |
| Toxicity end points                       | Immunotoxicity                                                                      | immuno        | Inactive   | 0.99        |
| Toxicity end points                       | Mutagenicity                                                                        | mutagen       | Inactive   | 0.64        |
| Toxicity end points                       | Cytotoxicity                                                                        | cyto          | Inactive   | 0.62        |
| Tox21-Nuclear receptor signaling pathways | Aryl hydrocarbon Receptor (AHR)                                                     | nr_ahr        | Inactive   | 0.86        |
| Tox21-Nuclear receptor signaling pathways | Androgen Receptor (AR)                                                              | nr_ar         | Inactive   | 0.99        |
| Tox21-Nuclear receptor signaling pathways | Androgen Receptor Ligand Binding Domain (AR-LBD)                                    | nr_ar_lbd     | Inactive   | 0.93        |
| Tox21-Nuclear receptor signaling pathways | Aromatase                                                                           | nr_aromatase  | Inactive   | 0.96        |
| Tox21-Nuclear receptor signaling pathways | Estrogen Receptor Alpha (ER)                                                        | nr_er         | Inactive   | 0.90        |
| Tox21-Nuclear receptor signaling pathways | Estrogen Receptor Ligand Binding Domain (ER-LBD)                                    | nr_er_lbd     | Inactive   | 0.91        |
| Tox21-Nuclear receptor signaling pathways | Peroxisome Proliferator Activated Receptor Gamma (PPAR-Gamma)                       | nr_ppar_gamma | Inactive   | 0.96        |
| Tox21-Stress response pathways            | Nuclear factor (erythroid-derived 2)-like 2/antioxidant response element (nrf2/ARE) | nr_nfe2l3     | Inactive   | 0.88        |
| Tox21-Stress response pathways            | Heat shock factor response element (HSE)                                            | nr_hse        | Inactive   | 0.88        |
| Tox21-Stress response pathways            | Mitochondrial Membrane Potential (MMP)                                              | nr_mmp        | Inactive   | 0.96        |
| Tox21-Stress response pathways            | Phosphoprotein (Tumor Suppressor) p53                                               | nr_p53        | Inactive   | 0.83        |
| Tox21-Stress response pathways            | ATPase family AAA domain-containing protein 5 (ATAD5)                               | nr_atad5      | Inactive   | 0.94        |

Fig S6. In Silico Toxicity Model Report for APAP(A) and 4-APB(B).

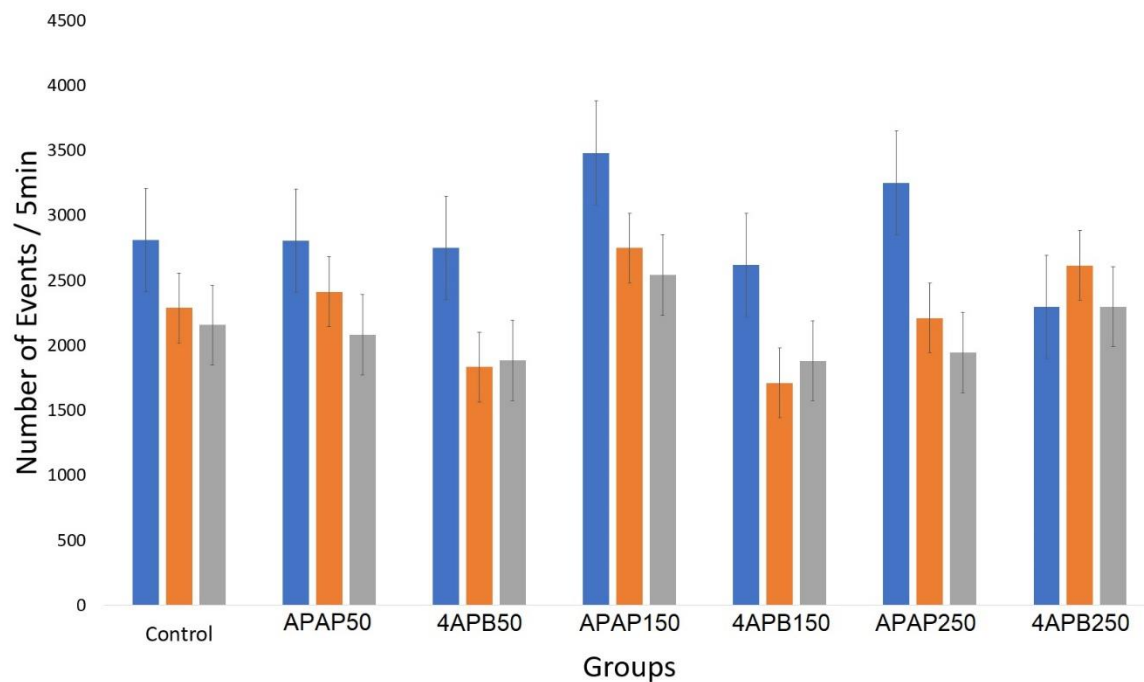

**FIGURE S7:** Number of events recorded for mice during 5 minutes of activity in an open field test. Prior to any procedure (blue), but also 2 h (orange) and 24 h (grey) after treatment administration.
