# Supplementary material for: A Boron-Containing Analogue of Acetaminophen Induces Analgesic Effect in Hot Plate Test and Limited Hepatotoxicity
Source: MDPI journal article supplement (doi:10.3390/inorganics11060261), 2023-06-20
Supplement: s1 [file s1]

Archive with 1 entries (1 files):
- inorganics-2436419-supplementary.pdf
